# Supplementary material
Source: publisher site journal article supplement (https://www.spandidos-publications.com/1190/downloadSupplementary)
Supplement: Supplementary file 1 [file downloadSupplementary]

Figure S1. Validation of VEGFR-1 staining in IHC analysis in human placenta. Representative fields of sections incubated with (A) or without (B) the anti-VEGFR-1 primary antibody are shown. Magnification, x25. VEGFR-1, vascular endothelial growth factor receptor 1; IHC, immunohistochemical.

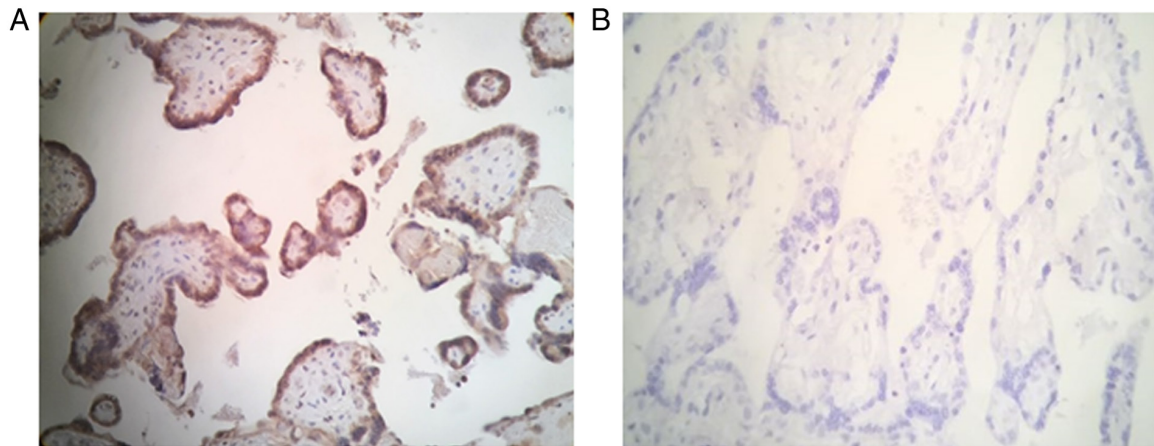

Table SI. Percentage of Iba1/VEGFR-1 double-positive cells.

| Patients   | Iba-1/VEGFR-1-positive cells (%) <sup>a</sup> |                     |
|------------|-----------------------------------------------|---------------------|
|            | Tumour                                        | Parenchyma          |
| 1          | 8                                             | 0                   |
| 2          | 0                                             | 0                   |
| 5          | 0                                             | 0                   |
| 6          | 33                                            | 5                   |
| 9          | 36                                            | 0                   |
| 13         | 21                                            | 8                   |
| 17         | 0                                             | 23                  |
| 18         | 27                                            | 14                  |
| 20         | 46                                            | 10                  |
| 21         | 14                                            | 36                  |
| 24         | 54                                            | 30                  |
| 25         | 48                                            | 15                  |
| 29         | 0                                             | 0                   |
| 31         | 7                                             | 27                  |
| 32         | 53                                            | 0                   |
| 34         | 29                                            | 0                   |
| 34         | 50                                            | 0                   |
| 35         | 21                                            | 24                  |
| 36         | 25                                            | 20                  |
| 37         | 6                                             | 8                   |
| 39         | 6                                             | 0                   |
| 41         | 24                                            | 0                   |
| 42         | 0                                             | 42                  |
| Mean ± SEM | 24±4                                          | 11±3 <sup>b,c</sup> |

<sup>a</sup>Percentages of cells simultaneously expressing Iba1 and VEGFR-1 in the parenchyma or tumour regions of GB specimens from samples analysed in Fig. 3. <sup>b</sup>Statistical analysis was performed by Wilcoxon signed-rank test; <sup>c</sup>P<0.05. Iba1, ionized calcium binding adaptor molecule 1; VEGFR-1, vascular endothelial growth factor receptor 1.
